# Supplementary material
Source: publisher figshare collection journal article supplement (https://frontiersin.figshare.com/ndownloader/files/24560321)
Supplement: Supplementary file 1 [file 24560321]

# Supplementary Table 1. Soil chemical characteristics (0-0.2 m depth) in the experimental area before initiating the experiment.

| Growing season | pH | SOM† | P(resin) | H+Al | K+ | Ca2+ | Mg2+ | CEC‡ | BS§ |
| --- | --- | --- | --- | --- | --- | --- | --- | --- | --- |
|  | CaCl2 | g kg–1 | mg kg–1 | mmolc dm-3 | | | | | % |
| 2011/2012 | 4.6 | 28 | 27 | 52 | 6,8 | 35 | 20 | 113 | 55 |
| 2012/2013 | 4.5 | 20 | 19 | 51 | 3,5 | 36 | 18 | 109 | 53 |
| 2014/2015 | 5.2 | 28 | 13 | 37 | 2,5 | 53 | 21 | 114 | 67 |

†Soil organic matter.

‡Cation exchange capacity.

§Base saturation.
